# Supplementary material for: Exploring the tolerance of marine yeast to inhibitory compounds for improving bioethanol production
Source: Royal Society of Chemistry journal article supplement (doi:10.1039/c9se00029a), 2019-01-01
Supplement: c9se00029a1.xlsx [file c9se00029a1.xlsx]

## Sheet: Strain details
Origins of terrestrial Saccharomyces spp used in this study
No.	Plate Position	Strain	Number	Species	Notes	DBVPG	CBS	NCYC	OTHER	Source	Place	Genotype	References
1	A01	96	96	S. cerevisiae	sequenced strain		alpha		S288c
2	A02	97	97	S. cerevisiae					Y55
3	A03	17	17	S. cerevisiae	SK1				M272	lab strain	USA		E. LOUIS
4	A04	281	281	S. cerevisiae	M264, BMA64-1A, a	,			W303			ura3-1, trp1-d2, leu2-3, his3-11, ade2-1, cal-100	EUROFAN
11	B01	303	303	S. cerevisiae					YJM978	clinical isolate	USA		McCusker
12	B02	304	304	S. cerevisiae					YJM981	clinical isolate	USA		McCusker
13	B03	308	308	S. cerevisiae					YJM975	clinical isolate	USA		McCusker
14	B04	284	284	S. cerevisiae					322134S	Human isolate	RVI Newcastle, UK
15	B05	287	287	S. cerevisiae					378604X	Human isolate	RVI Newcastle, UK
16	B06	288	288	S. cerevisiae					273614N	Human isolate	RVI Newcastle, UK
23	C01	84	84	S. cerevisiae		1788				soil	Turku, Finland		A. VAUGHAN
24	C02	91	91	S. cerevisiae		1373				soil	The Netherlands		A. VAUGHAN
25	C03	174	174	S. cerevisiae					YIIc17_E5	wine	France (Sauternes)
26	C04	155	155	S. cerevisiae	S. fructum	6040	1544			fermenting fruit juice	netherland		A. VAUGHAN
27	C05	248	284	S. cerevisiae					322134S	Human isolate	RVI Newcastle, UK
28	C07	352	352	S. arboricolus	2.3319								BAY
29	C08	170	170	S. paradoxus					Q89.8
30	C09	171	171	S. paradoxus					Q95.3
31	C10	172	172	S. paradoxus					S36.7
32	C11	173	173	S. paradoxus					Z1.1
33	C12	293	293	S. paradoxus					Y9.6		London, UK
34	D01	182	182	S. cerevisiae					YPS606	woodland	Pennsylvanian		SNIEGOWSKI
35	D02	104	104	S. cerevisiae					YPS128	Soil beneath(Q. alba)	Pennsylvanian		SNIEGOWSKI
36	D03	258	258	S. cerevisiae					YS2	Australian baker's yeast			BELL
37	D04	259	259	S. cerevisiae					YS4 (E)	Dutch baker's yeast			BELL
38	D05	262	262	S. cerevisiae					YS9 (E)	Singaporean baker's yeast			BELL
39	D06	181	181	S. cerevisiae					BC187	monosporic derivatives from UCD2120
40	D07	379	379	S. paradoxus	single colony from OS342
41	D08	294	294	S. paradoxus					Q74.4		London, UK
42	D09	296	296	S. paradoxus					Q96.8		London, UK
43	D10	297	297	S. paradoxus					LD7		London, UK
44	D11	298	298	S. paradoxus					Q31.4		London, UK
45	D12	299	299	S. paradoxus					Y8.5		London, UK
46	E01	278	278	S. cerevisiae	race uvarum				UWOPS03-461.4	Nectar, Bertam palm	Malaysia		Lachance
47	E02	279	279	S. cerevisiae	race uvarum				UWOPS05-217.3	Nectar, Bertam palm	Malaysia	Mel-	Lachance
48	E03	280	280	S. cerevisiae					UWOPS05-227.2	Trigona, Bertam palm	Malaysia	Mel+	Lachance
49	E04	251	251	S. cerevisiae						K11 (Awamori-1) a Shochu Sake strain			Justin Fay
50	E05	252	252	S. cerevisiae						Y9 (NRRL-Y5997) a strain from ragi that is similar to the sake wines			Justin Fay
51	E07	345	345	S. cerevisiae	RM11_1A						California	Mat a
52	E08	301	301	S. paradoxus					Z1		London, UK
53	E09	302	302	S. paradoxus					Y8.1		London, UK
54	E11	254	354	S. cerevisiae	YJM280								Fay JC
55	E12	255	355	S. cerevisiae	CLIB324								Fay JC
56	F01	92	92	S. cerevisiae		1853				white Tecc	Ethiopia		A. VAUGHAN
57	F02	253	253	S. cerevisiae	same strain of OS246					Y12 (NRRL-Y12663) an african palm wine strain			Justin Fay
58	F03	247	247	S. cerevisiae	Saccharomyces chavalieri	6042		110		Ginger beer, from Zingiber officinale, West Africa.			Steve
59	F04	60	60	S. cerevisiae	T of mangini	6044	405			bili wine	West Africa
60	F05	3	3	S. cerevisiae	S. boulardii	6765					France		A. MARTINI
61	F06	382	382	S. cerevisiae	ZP 567					Q. pyrenaica	Portugal, Castelo de Vide,
62	F07	115	115	S. paradoxus					YPS138	Soil beneath(Q. velutina)	Pennsylvanian		SNIEGOWSKI
63	F08	32	32	S. paradoxus		6304			UCD-51-186		Davis, USA		A. VAUGHAN
64	F09	186	186	S. paradoxus					A4		Montreal		Graham Bell
65	F10	187	187	S. paradoxus					A12		Montreal		Graham Bell
66	F11	20	20	S. paradoxus					UFRJ50791	Drosophila	Catalao Point, Brazil		E. LOUIS
67	F12	21	21	S. paradoxus					UFRJ50816	Drosophila	Tijuca Forest, Brazil		E. LOUIS
68	G01	220	220	S. cerevisiae					L-1374		Chile		Martinez C
69	G02	221	221	S. cerevisiae					L-1528		Chile		Martinez C
70	G03	271	271	S. cerevisiae					UWOPS87-2421	Cladode, Opuntia megacantha	Hawaii		Lachance
71	G04	150	150	S. cerevisiae		1106					Australia
72	G05	270	270	S. cerevisiae					UWOPS83-787.3	Fruit, Opuntia stricta	Bahamas		Lachance
73	G06	388	388	S.uvarum	ZP 555					Q. garryana	Canada, Hornby Island,
74	G07	76	76	S. paradoxus			8437		N-43		Russia
75	G08	77	77	S. paradoxus			8438		N-44		Russia
76	G09	78	78	S. paradoxus			8439		N-45		Russia
77	G10	137	137	S. paradoxus					IFO1804	bark	Japan
78	G12	273	273	S. paradoxus					UWOPS91-917.1	Flux, Myoporum	Hawaii		Lachance
79	H01	238	238	S. cerevisiae	single colony from OS237				YJM789				Lars M. Steinmetz
80	H02	391	391	S. kudriavzevii	ZP 542					Q. pyrenaica	Portugal, Adagoi,
81	H03	18	18	S. mikatae					IFO1815	soil	Japan		E. LOUIS
82	H04	19	19	S. mikatae					IFO1816	Decayed leaf	Japan		E. LOUIS
83	H05	392	392	S. kudriavzevii	ZP 594					Q. faginea	Portugal, Aldeia das Dez, S. Estrela,
84	H06	22	22	S. kudriavzevii					IFO1802	Decayed leaf	Japan		E. LOUIS
85	H07	23	23	S. kudriavzevii					IFO1803	Decayed leaf	Japan		E. LOUIS
86	H08	122	122	S. kudriavzevii					NBRC 10990	Decayed leaf	Japan
87	H09	24	24	S.uvarum	var. uvarum	6299	7001				Peoria, USA		E. LOUIS
88	H10	222	222	S.uvarum					L-1764		Chile		Martinez C
89	H11	274	274	S.uvarum					UWOPS99-807.1.1	Flux, Nothofagus sp.	Argentina		Lachance
90	H12	138	138	S. castelli		6298	4309		Y-12630	soil	Finland

## Sheet: raw data
	Ranking of phenotypic response (RSI = redox signal intensity) for yeast derived from seawater (M1-M15) in the presence of 50 mM acetic acid, 10 mM formic acid, 10 mM furfural, 10 mM HMF and overall. S. cerevisiae NCYC2592 and S. cerevisiae S288C are included for comparisons. Data representative of triplicate values.
	Strains	Acetic acid (RSI)	Formic acid (RSI)	Furfural (RSI)	HMF (RSI)	Ranking Acetic Acid	Ranking Formic Acid	Ranking Furfural	Ranking HMF	Overall Ranking
S. cerevisiae	NCYC 2592	97.84	109.24	101.15	80.12	173	173	147	85	578
S. cerevisiae	S288C	49.8239	43.3333	44.3333	52.3333	31	38	7	6	82
S. cerevisiae	Y55	82.999	99.3473	82.999	92.4307	132	154	82	125	493
S. cerevisiae	SK1	80.644	83.5501	74.8318	81.3705	113	103	53	91	360
S. cerevisiae	W303	81.7459	100.324	78.7733	83.9753	124	159	66	98	447
S. cerevisiae	YJM978	79.2683	97.561	93.9024	96.3415	107	145	129	131	512
S. cerevisiae	YJM981	78.2051	95.5128	92.3077	79.4872	100	137	120	84	441
S. cerevisiae	YJM975	94.6565	109.924	106.107	89.313	167	174	153	114	608
S. cerevisiae	322134S	93.75	109.028	97.2222	86.8056	165	173	141	108	587
S. cerevisiae	378604X	78.7402	111.024	88.189	101.575	105	176	101	141	523
S. cerevisiae	273614N	93.5484	87.0968	85.1613	77.4194	163	114	90	76	443
S. cerevisiae	DBVPG1788	92.4051	112.025	91.7722	94.9367	161	177	119	130	587
S. cerevisiae	DBVPG1373	97.2973	103.378	79.7297	71.6216	173	166	69	64	472
S. cerevisiae	YIIc17_E5	83.3006	95.4813	90.9627	66.6012	133	136	116	46	431
S. cerevisiae	DBVPG6040	78	96.6667	74.6667	81.3333	98	141	52	90	381
S. cerevisiae	322134S	91.6031	113.74	77.0992	92.3664	158	178	59	124	519
S. arboricolus	2.3319	82.9932	96.5986	76.1905	74.8299	131	139	58	71	399
S. paradoxus	Q89.8	94.4882	107.874	89.7638	89.7638	166	171	109	117	563
S. paradoxus	Q95.3	109.091	137.273	86.3636	78.1818	179	184	94	80	537
S. paradoxus	S36.7	87.8378	102.027	80.4054	73.6486	151	162	74	70	457
S. paradoxus	Z1.1	99.1966	101.79	75.2079	66.1311	176	160	56	42	434
S. paradoxus	Y9.6	93.3314	102.732	103.179	63.7876	162	165	150	32	509
S. cerevisiae	YPS606	95.1745	124.327	90.0299	88.315	169	182	110	112	573
S. cerevisiae	YPS128	96.0578	123.503	85.5641	98.4794	171	181	92	138	582
S. cerevisiae	YS2	97.8999	121.998	86.6038	81.3323	174	179	95	89	537
S. cerevisiae	YS4	82.1601	102.541	85.3446	75.7911	129	164	91	73	457
S. cerevisiae	YS9	96.4872	105.676	87.9543	91.8926	172	170	100	122	564
S. cerevisiae	BC187	90.8158	98.7128	77.8421	83.4829	156	150	62	96	464
S. paradoxus	GL379	76.2133	84.2683	67.5386	57.005	92	106	44	9	251
S. paradoxus	Q74.4	79.8826	99.1024	108.312	73.0755	110	152	159	68	489
S. paradoxus	Q96.8	79.3121	97.5245	79.8996	87.537	108	144	71	110	433
S. paradoxus	LD7	78.5148	89.565	83.7491	77.9332	102	124	85	78	389
S. paradoxus	Q31.4	69.2463	81.1853	90.1396	84.767	67	100	112	100	379
S. paradoxus	Y8.5	84.7077	105.088	88.5291	85.3446	137	169	102	103	511
S. cerevisiae	UWOPS03-461.4	83.8542	95.8333	94.7917	81.7708	135	138	132	93	498
S. cerevisiae	UWOPS05-217.3	87.8613	103.468	100	90.1734	152	167	145	118	582
S. cerevisiae	UWOPS05-227.2	76.1364	88.6364	80.6818	75	91	119	76	72	358
S. cerevisiae	K11	81.8182	99.6047	95.0593	67.9842	125	156	134	52	467
S. cerevisiae	Y9	71.6981	101.887	93.7107	86.7925	76	161	128	107	472
S. cerevisiae	RM11	78.0347	93.6416	79.7688	85.5491	99	132	70	104	405
S. paradoxus	Z1	78.3439	92.9936	87.2611	80.8917	101	130	97	87	415
S. paradoxus	Y8.1	79.1946	99.3289	87.2483	85.906	106	153	96	105	460
S. cerevisiae	KPN3828	90.5005	102.453	93.3465	89.3622	154	163	124	115	556
S. cerevisiae	KPN3829	82.9612	91.317	79.977	79.3802	130	126	72	83	411
S. cerevisiae	DBVPG1853	71.2702	77.4676	67.2861	58.8754	73	94	42	18	227
S. cerevisiae	Y12	79.3659	97.3504	93.4407	65.2912	109	142	125	37	413
S. cerevisiae	NCYC110	70.9775	99.7356	84.4387	87.4981	72	157	87	109	425
S. cerevisiae	DBVPG6044	74.6532	99.9593	78.4491	84.7756	87	158	64	101	410
S. cerevisiae	DBVPG6765	75.6667	89.263	88.6719	91.6276	90	123	104	121	438
S. cerevisiae	NCYC361	73.2565	93.6362	82.6202	77.6629	81	131	81	77	370
S. paradoxus	YPS138	78.5776	86.3065	88.8828	77.9335	103	111	106	79	399
S. paradoxus	DBVPG6304	81.8729	97.3791	91.1766	88.0754	126	143	118	111	498
S. paradoxus	A4	66.7315	77.1241	79.3121	65.6376	62	93	67	39	261
S. paradoxus	A12	85.6938	84.6488	88.829	72.3172	140	108	105	66	419
S. paradoxus	UFRJ50791	83.3729	89.0574	82.1096	85.2677	134	122	79	102	437
S. paradoxus	UFRJ50816	69.1838	83.2654	66.7348	79.5919	66	102	41	85	294
S. cerevisiae	L-1374	85.0622	89.8209	85.657	83.2777	138	125	93	94	450
S. cerevisiae	L-1528	74.9089	97.7328	76.0794	83.6873	88	148	57	97	390
S. cerevisiae	UWOPS87-2421	93.7117	99.4705	91.0941	81.147	164	155	117	88	524
S. cerevisiae	DBVP1106	80.9254	91.9871	87.3295	86.7473	117	127	98	106	448
S. cerevisiae	UWOPS83-787.3	80.6478	86.6589	74.1359	68.6258	114	113	50	55	332
S. uvarum	ZP555	85.8332	94.8366	99.2383	78.6304	141	135	144	82	502
S. paradoxus	N-43	70.8081	83.7383	89.2798	91.127	71	105	107	120	403
S. paradoxus	N-44	90.7721	92.4225	87.4713	96.5485	155	128	99	132	514
S. paradoxus	N-45	86.7767	94.6146	90.1358	89.576	146	133	111	116	506
S. paradoxus	IFO1804	105.816	108.1	90.5911	80.6946	177	172	115	86	550
S. paradoxus	UWOPS91-917.1	98.6198	124.534	97.1801	97.8999	175	183	140	137	635
S. cerevisiae	YJM789	80.8391	97.7099	94.1951	88.5715	116	147	130	113	506
S. kudriavzevii	ZP452	85.2605	87.2433	81.7906	71.3808	139	115	77	63	394
S. mikatae	IFO1815	87.0496	88.6517	93.6362	83.3113	148	120	126	95	489
S. mikatae	IFO1816	60.6619	88.2901	78.0797	73.2748	50	118	63	69	300
S. kudriavzevii	ZP594	76.3814	98.9486	78.696	76.96	94	151	65	75	385
S. kudriavzevii	IFO1802	73.4891	87.3437	77.1034	76.501	83	116	60	74	333
S. kudriavzevii	IFO1803	49.646	55.9303	50.9029	17.5961	29	55	8	4	96
S. kudriavzevii	NBRC10990	81.0006	98.4827	95.569	96.7345	119	149	135	133	536
S. uvarum	DBVPG6299	26.738	110.963	92.9144	94.2513	15	175	123	128	441
S. uvarum	L-1764	30.6878	80.1587	37.7297	33.3333	17	96	6	5	124
S. uvarum	UWOPS99-807.1.1	56.0957	122.289	71.5033	58.3396	43	180	47	16	286
S. castelli	CBS4309	94.7165	105.026	90.2062	78.6082	168	168	113	81	530
Marine	AZ1	84.6667	49.3333	74.8889	64	136	48	54	36	274
Marine	AZ2	55.1451	21.6667	83.3333	91	42	18	84	119	263
Marine	AZ3	80.6667	47.1111	73.2222	61.3333	115	44	49	26	234
Marine	AZ4	88.6667	48	56.3333	67.6667	153	46	18	50	267
Marine	AZ7	92.3333	41.3333	67.3333	64	160	33	43	36	272
Marine	AZ8	108.333	37	66.6667	66.3333	178	25	39	45	287
Marine	AZ9	113.667	45.3333	56	68.6667	181	42	16	59	298
Marine	AZ10	114	94.6667	62.6667	64	182	134	33	36	385
Marine	AZ11	119	97.6667	67.6667	68	184	146	45	53	428
Marine	AZ12	86.6667	86.3333	60	68.6667	145	112	28	57	342
Marine	AZ13	91	37.6667	96.6667	93.6667	157	26	138	126	447
Marine	AZ14	78.6667	16.8889	63.8889	65.6667	104	16	35	40	195
Marine	AZ15	46.3333	13.3333	57.3333	61.6667	24	12	23	28	87
Marine	AZ16	81	27.6667	84.3333	58	118	19	86	13	236
Marine	AZ17	60.6667	10.6667	59.3333	68.6667	52	10	27	57	146
Marine	AZ18	73.6667	44.3333	57	63.6667	84	40	22	31	177
Marine	AZ20	74	13.3333	56.6667	61.3333	85	13	20	25	143
Marine	AZ21	75	33.6667	23	58	89	21	4	13	127
Marine	AZ22	76.6667	86	51.6667	57.6667	95	110	9	11	225
Marine	AZ23	113.667	96.6667	55.6667	64	181	140	15	36	372
Marine	AZ24	72	14.7778	65.3333	69.3333	77	14	38	60	189
Marine	AZ25	42.3333	45.3333	101.667	97.3333	23	42	149	136	350
Marine	AZ26	80	50.6667	68.3333	68.3333	112	50	46	54	262
Marine	AZ27	72.6667	49	62.6667	65.3333	80	47	33	38	198
Marine	AZ28	51.6667	39.3333	62.6667	66.3333	38	31	33	43	145
Marine	AZ29	60.6667	39.3333	65	67	52	31	37	48	168
Marine	AZ30	81.24	41.6667	61.6667	67	120	35	30	48	233
Marine	AZ31	70.3333	51.6667	71.6667	59.3333	68	51	48	23	190
Marine	AZ32	82	80.6667	66.6667	66.3333	128	98	40	45	311
Marine	AZ33	60.3333	55.3333	114.667	100.667	49	54	173	140	416
Marine	AZ35	81.3333	78.3333	121.444	130	122	95	178	182	577
Marine	AZ36	76.3333	74.6667	109	121.667	93	89	161	172	515
Marine	AZ37	70.3333	68.3333	106	120.667	70	77	152	168	467
Marine	AZ38	66.3333	63.3333	106.333	117	61	63	155	162	441
Marine	AZ39	67	69.3333	105.667	119	63	80	151	165	459
Marine	AZ40	71.3333	68.6667	106.667	114.333	75	78	157	158	468
Marine	AZ42	72.3333	75.6667	111	122	79	91	168	173	511
Marine	AZ43	72.3333	70.6667	110.667	122.333	79	82	165	175	501
Marine	AZ45	59.6667	87.6667	85	59	47	117	89	21	274
Marine	AZ47	61.453	59.6667	106.667	104.333	53	58	156	146	413
Marine	AZ52	58.457	33.6667	95	92	45	23	133	123	324
Marine	AZ59	19.6667	66.3333	74.3333	56	9	72	51	8	140
Marine	AZ60	65	62.7778	117.667	115.333	58	61	176	161	456
Marine	AZ61	34.3333	15	82.3333	84	21	15	80	99	215
Marine	AZ63	33.6667	11.6667	79.6667	81.6667	20	11	68	92	191
Marine	AZ64	68.6667	65	114	121.333	65	68	171	171	475
Marine	AZ65	71.3333	63.6667	110.667	123	75	64	164	177	480
Marine	AZ66	34.3333	17	83.3333	94.3333	22	17	83	129	251
Marine	AZ67	49.6667	31	89.6667	105.333	30	20	108	147	305
Marine	AZ68	74.3333	71.3333	126.333	119.333	86	85	180	166	517
Marine	AZ69	81.3333	81.8889	130.778	133.667	122	101	183	183	589
Marine	AZ70	59.6667	56.3333	108	114.333	46	56	158	158	418
Marine	AZ71	73.3333	68	117	122.333	82	75	175	175	507
Marine	AZ72	87.6667	84.6667	127.667	119	150	109	181	165	605
Marine	AZ73	49	41.6667	101	109.333	27	34	147	152	360
Marine	AZ74	53	38	97.3333	109.667	40	27	142	153	362
Marine	AZ75	52.3333	46.3333	101	114.667	39	43	147	159	388
Marine	AZ76	95.6667	92.6667	135.333	125.333	170	129	184	178	661
Marine	AZ77	51.6667	65.4444	92.5556	97.3333	37	69	121	136	363
Marine	AZ78	54.3333	62.3333	82	99	41	60	78	139	318
Marine	AZ79	32.6667	66.3333	77.6667	94	19	72	61	127	279
Marine	AZ80	26	8.66667	75	55.3333	14	7	55	7	83
Marine	AZ81	50	43.3333	94.3333	102.333	33	38	131	142	344
Marine	AZ82	50	40.3333	92.6667	106.667	33	32	122	149	336
Marine	AZ85	60	73.3333	101.333	107.667	48	88	148	150	434
Marine	AZ86	61.6667	44	99	114	54	39	143	156	392
Marine	AZ89	117.333	70.3333	61.4444	66	183	81	29	41	334
Marine	AZ91	82	9.66667	80.3333	97.3333	128	9	73	136	346
Marine	AZ93	8.66667	8	58.6667	58.3333	5	6	26	15	52
Marine	AZ94	9.33333	9	58.6667	59.3333	6	8	25	24	63
Marine	AZ95	77	75.5556	126.333	133.667	97	90	180	184	551
Marine	AZ97	70.3333	72.6667	113	127.333	70	87	170	181	508
Marine	AZ98	8.66667	8	58.3333	59	4	6	24	21	55
Marine	AZ99	62.3333	71.3333	111.667	119.667	56	85	169	167	477
Marine	AZ100	46.3333	38.6667	93.6667	106.667	25	28	127	149	329
Marine	AZ101	86.3333	88.6667	114.333	126.667	143	121	172	180	616
Marine	AZ102	48.6667	34.3333	95.6667	103	26	24	137	144	331
Marine	AZ104	51.6667	42.3333	95.6667	108.333	37	36	137	151	361
Marine	AZ105	51.6667	68.3333	111	103.333	35	76	168	145	424
Marine	AZ107	86.3333	66.6667	25.6667	57.3333	143	73	5	10	231
Marine	AZ108	87.6667	63.3333	54.3333	58.6667	149	62	14	17	242
Marine	AZ109	91.6667	84.3333	57	62	159	107	22	29	317
Marine	AZ110	81.6667	77	56.6667	59	123	92	20	21	256
Marine	AZ111	86.42	47.3333	97	102.667	144	45	139	143	471
Marine	AZ112	80	83.6667	88.6667	61.6667	112	104	103	28	347
Marine	AZ115	76.6667	38.6667	90.3333	58.3333	96	29	114	15	254
Marine	AZ116	87	80.8889	130.667	122.667	147	99	182	176	604
Marine	AZ117	67.6667	64.3333	115	119	64	65	174	165	468
Marine	AZ118	65.3333	65	110.667	121	59	68	164	169	460
Marine	AZ120	51.6545	80.6667	80.6667	70	34	98	75	61	268
Marine	AZ122	49	33.6667	85	113	28	22	89	155	294
Marine	AZ123	62.6667	60.6667	111	121.333	57	59	168	170	454
Marine	AZ125	56.6667	52	108.667	111.333	44	52	160	154	410
Marine	AZ126	62	49.6667	106.333	115	55	49	155	160	419
Marine	AZ127	66.3333	67	119.333	126.667	61	74	177	179	491
Marine	AZ140	20.6667	72.2222	109.889	71.6667	11	86	162	65	324
Marine	AZ142	30	71	65	70.3333	16	83	37	62	198
Marine	AZ143	20.3333	64.6667	56.3333	67.6667	10	66	17	50	143
Marine	AZ144	32	69.3333	62.6667	73	18	79	34	67	198
Marine	AZ145	21	66.3333	54.3333	68.6667	12	72	14	59	157
Marine	AZ147	23	8	54.3333	67.6667	13	6	12	51	82
Marine	AZ148	19	56.6667	53.3333	63.3333	8	57	10	30	105
Marine	AZ150	13.3333	54.6667	53.6667	59.3333	7	53	11	23	94

## Sheet: Sheet1
Comparison of terrestrial and marine-derived yeast for their growth curves in the presence of 50 mM acetic acid, 10 mM formic acid, 10 mM furfural, 5 mM vanillin, and 3% salt (NaCl). AuC = Area under the growth curve of the yeast.
No.	Hapitat	Species	Isolate No.	Strain No.	Acetic acid (AuC)	Formic acid (AuC)	vanillin (AuC)	Furfural (AuC)	Salt (AuC)		Ranking Acetic acid	Ranking Formic acid	Ranking Vanillin	Ranking Furfural	Ranking Salt	Ranking Overall
1	Terrestrial	S. cerevisiae		NCYC 2592	88.0079	90.0584	87.3585	86.2037	40.202		93	92	98	100	49	432
2	Terrestrial	S. cerevisiae	A1	S288C	49.1678	48.3476	42.9576	67.8389	28.5663		9	8	8	7	24	56
3	Terrestrial	S. cerevisiae	A2	Y55	42.5269	36.5676	36.8188	79.5228	14.0737		8	7	7	39	2	63
4	Terrestrial	S. cerevisiae	A3	SK1	38.7736	33.4649	33.5692	81.6158	30.0949		6	6	6	60	27	105
5	Terrestrial	S. cerevisiae	A4	W303	33.8615	29.5227	29.5278	85.4307	14.3087		4	4	5	94	3	110
6	Terrestrial	S. cerevisiae	B1	YJM978	80.0634	70.3978	69.8918	82.5167	16.928		65	55	68	68	5	261
7	Terrestrial	S. cerevisiae	B2	YJM981	86.9181	76.0816	76.7263	78.9866	12.6274		89	69	86	36	1	281
8	Terrestrial	S. cerevisiae	B3	YJM975	79.2382	68.7434	69.7253	78.6941	38.1089		60	45	66	35	43	249
9	Terrestrial	S. cerevisiae	B4	322134S	85.0096	72.5276	74.0029	76.7547	20.6714		81	62	78	28	9	258
10	Terrestrial	S. cerevisiae	B5	378604X	77.3828	66.4534	68.1566	73.2238	28.6086		52	34	59	16	25	186
11	Terrestrial	S. cerevisiae	B6	273614N	76.2215	66.2565	64.5708	79.1299	32.7261		48	33	46	37	34	198
12	Terrestrial	S. cerevisiae	C1	DBVPG1788	83.3114	72.725	71.42	88.3149	33.4132		74	63	74	122	37	370
13	Terrestrial	S. cerevisiae	C2	DBVPG1373	79.8954	68.8575	70.6205	85.546	31.6233		64	48	71	96	30	309
14	Terrestrial	S. cerevisiae	C3	YIIc17_E5	85.7031	73.776	74.983	75.8286	28.5411		84	65	80	22	23	274
15	Terrestrial	S. cerevisiae	C4	DBVPG6040	79.0897	68.8135	69.3019	81.3402	27.0292		59	46	65	55	18	243
16	Terrestrial	S. cerevisiae	C5	322134S	89.1775	77.5861	78.8646	81.0751	27.75		103	73	89	51	20	336
17	Terrestrial	S. arboricolus	C7	2.3319	79.2818	69.1532	69.0688	86.0398	22.7589		61	50	63	98	14	286
18	Terrestrial	S. paradoxus	C8	Q89.8	60.5196	52.7175	53.3025	81.8958	14.7081		13	11	14	61	4	103
19	Terrestrial	S. paradoxus	C9	Q95.3	61.8918	54.2007	53.8049	81.532	20.2409		15	14	15	58	8	110
20	Terrestrial	S. paradoxus	C10	S36.7	72.3176	62.7957	58.8378	85.3811	32.3362		36	25	28	92	32	213
21	Terrestrial	S. paradoxus	C11	Z1.1	82.5549	71.4679	67.5793	80.6869	21.4061		73	59	56	47	12	247
22	Terrestrial	S. paradoxus	C12	Y9.6	88.5554	77.2488	76.4815	81.9867	18.1672		95	71	83	63	6	318
23	Terrestrial	S. cerevisiae	D1	YPS606	79.0882	69.0727	68.0134	76.9363	19.3814		58	49	58	30	7	202
24	Terrestrial	S. cerevisiae	D2	YPS128	85.8128	70.0818	70.0265	80.65	34.1694		85	53	69	46	39	292
25	Terrestrial	S. cerevisiae	D3	YS2	61.8987	53.7797	50.4088	88.2407	26.6479		16	13	13	119	17	178
26	Terrestrial	S. cerevisiae	D4	YS4	65.7689	57.2402	55.4404	86.1593	27.8034		20	17	21	99	21	178
27	Terrestrial	S. cerevisiae	D5	YS9	84.0046	74.2003	71.11	78.2625	30.5618		77	66	72	34	28	277
28	Terrestrial	S. cerevisiae	D6	BC187	76.1667	66.6589	62.089	85.3646	45.2351		46	37	39	91	58	271
29	Terrestrial	S. paradoxus	D7	GL379	74.8356	65.3206	62.8342	87.0728	33.5564		44	30	41	107	38	260
30	Terrestrial	S. paradoxus	D8	Q74.4	70.5972	61.8316	62.1546	84.2929	29.8786		33	22	40	83	26	204
31	Terrestrial	S. paradoxus	D9	Q96.8	66.2191	58.2744	54.8217	75.3397	40.0078		21	18	19	19	48	125
32	Terrestrial	S. paradoxus	D10	LD7	83.4448	72.0532	67.7183	86.4093	23.227		76	60	57	101	15	309
33	Terrestrial	S. paradoxus	D11	Q31.4	56.5432	48.841	44.1158	86.5949	27.2011		10	9	10	103	19	151
34	Terrestrial	S. paradoxus	D12	Y8.5	86.3172	86.1536	65.0289	77.3671	21.1587		87	90	49	31	11	268
35	Terrestrial	S. cerevisiae	E1	UWOPS03-461.4	76.1685	66.5925	56.0063	80.3632	59.6144		47	36	23	43	74	223
36	Terrestrial	S. cerevisiae	E2	UWOPS05-217.3	81.1715	70.6351	66.115	85.0621	44.4738		68	56	52	88	56	320
37	Terrestrial	S. cerevisiae	E3	UWOPS05-227.2	89.8028	75.0044	70.1712	87.5194	61.6349		108	68	70	110	75	431
38	Terrestrial	S. cerevisiae	E4	K11	81.6704	71.4006	68.5231	81.0943	22.4506		70	58	60	53	13	254
39	Terrestrial	S. cerevisiae	E5	Y9	70.4927	61.8357	55.0781	75.8705	62.5811		32	23	20	23	78	176
40	Terrestrial	S. cerevisiae	E7	RM11	104.131	92.3117	78.9786	76.9165	41.6662		143	94	90	29	52	408
41	Terrestrial	S. paradoxus	E8	Z1	73.276	63.4534	54.0703	71.284	46.9926		39	27	17	12	61	156
42	Terrestrial	S. paradoxus	E9	Y8.1	82.3854	72.1245	64.1731	66.6053	48.4348		72	61	45	1	62	241
43	Terrestrial	S. cerevisiae	E11	KPN3828	77.2343	67.9103	60.407	76.086	63.3624		51	41	32	25	79	228
44	Terrestrial	S. cerevisiae	E12	KPN3829	77.4799	67.7904	61.7386	71.2233	46.5269		53	39	37	11	60	200
45	Terrestrial	S. cerevisiae	F1	DBVPG1853	74.8109	66.4809	61.3842	69.5238	69.4053		43	35	36	9	84	207
46	Terrestrial	S. cerevisiae	F2	Y12	83.355	73.4233	64.8475	67.8037	41.9332		75	64	48	6	53	246
47	Terrestrial	S. cerevisiae	F3	NCYC110	76.0836	67.4879	60.475	66.743	50.0754		45	38	33	2	65	183
48	Terrestrial	S. cerevisiae	F4	DBVPG6044	88.935	77.7744	68.7163	76.1714	83.0341		100	74	62	26	117	379
49	Terrestrial	S. cerevisiae	F5	DBVPG6765	79.2961	69.3512	65.5809	74.1228	38.3195		62	51	50	17	45	225
50	Terrestrial	S. cerevisiae	F6	NCYC361	77.8772	68.7071	60.8162	67.3737	64.6952		55	44	34	5	81	219
51	Terrestrial	S. paradoxus	F7	YPS138	94.0051	93.9362	76.7827	66.8256	38.1617		125	97	87	3	44	356
52	Terrestrial	S. paradoxus	F8	DBVPG6304	72.1241	63.9927	54.7792	70.8491	80.1445		35	28	18	10	106	197
53	Terrestrial	S. paradoxus	F9	A4	70.4033	61.8894	57.5159	75.9047	53.0296		31	24	24	24	68	171
54	Terrestrial	S. paradoxus	F10	A12	90.734	79.9818	71.3486	71.5255	45.4016		114	80	73	13	59	339
55	Terrestrial	S. cerevisiae	F11	UFRJ50791	88.7838	78.0792	67.4	77.5348	56.3563		99	75	55	32	71	332
56	Terrestrial	S. cerevisiae	F12	UFRJ50816	95.108	83.1363	79.7083	76.597	52.6358		132	85	91	27	67	402
57	Terrestrial	S. cerevisiae	G1	L-1374	90.7058	79.5084	74.696	82.7325	57.9034		113	79	79	74	72	417
58	Terrestrial	S. cerevisiae	G2	L-1528	88.732	78.362	69.8494	69.0476	62.2132		98	77	67	8	76	326
59	Terrestrial	S. cerevisiae	G3	UWOPS87-2421	63.5624	55.7712	53.9106	66.9408	44.2004		17	15	16	4	55	107
60	Terrestrial	S. cerevisiae	G4	DBVP1106	69.1287	60.2551	58.5621	83.9287	62.2651		27	20	27	81	77	232
61	Terrestrial	S. cerevisiae	G5	UWOPS83-787.3	74.4626	65.5365	61.7571	82.5384	33.2211		41	31	38	69	36	215
62	Terrestrial	S. bayanus var uvarum	G6	ZP555	34.0819	29.6906	28.711	77.8436	49.4403		5	5	4	33	64	111
63	Terrestrial	S. paradoxus	G7	N-43	79.3245	70.2152	65.6931	79.8546	34.7785		63	54	51	41	41	250
64	Terrestrial	S. paradoxus	G8	N-44	76.4932	68.1029	63.1514	75.612	43.5492		49	42	42	21	54	208
65	Terrestrial	S. paradoxus	G9	N-45	73.128	65.0007	58.5602	81.0886	31.1595		38	29	26	52	29	174
66	Terrestrial	S. paradoxus	G10	IFO1804	74.1276	65.7198	61.2405	79.4726	34.2082		40	32	35	38	40	185
67	Terrestrial	S. paradoxus	G12	UWOPS91-917.1	79.0751	68.8148	66.8429	85.3817	20.858		57	47	54	93	10	261
68	Terrestrial	S. cerevisiae	H1	YJM789	89.6461	78.0866	71.9605	79.853	37.738		106	76	75	40	42	339
69	Terrestrial	S. kudriavzevii	H2	ZP452	64.5086	56.6014	47.9677	83.8548	28.0942		18	16	11	80	22	147
70	Terrestrial	S. mikatae	H3	IFO1815	70.668	62.8123	59.7919	87.8546	32.9583		34	26	30	115	35	240
71	Terrestrial	S. mikatae	H4	IFO1816	69.6974	61.65	59.4569	86.7855	56.312		29	21	29	106	70	255
72	Terrestrial	S. kudriavzevii	H5	ZP594	78.464	69.9718	68.5595	88.5423	41.5244		56	52	61	124	51	344
73	Terrestrial	S. kudriavzevii	H6	IFO1802	66.3882	58.9227	55.555	84.513	31.7199		22	19	22	84	31	178
74	Terrestrial	S. kudriavzevii	H7	IFO1803	80.3539	71.158	66.7521	87.5434	50.9218		66	57	53	111	66	353
75	Terrestrial	S. kudriavzevii	H8	NBRC10990	28.0798	24.8501	24.4285	90.1523	26.2262		1	1	1	134	16	153
76	Terrestrial	S. bayanus	H9	DBVPG6299	33.4001	28.5821	28.587	91.2886	45.0884		3	3	3	140	57	206
77	Terrestrial	S. bayanus	H11	UWOPS99-807.1.1	30.0485	26.1261	26.5251	91.0413	39.1924		2	2	2	139	47	192
78	Terrestrial	S. castelli	H12	CBS4309	60.7521	53.1545	49.5315	87.5434	49.1008		14	12	12	112	63	213
79	Marine	Candida viswanathii	AZ8		87.7971	103.763	100.374	93.3694	91.579		92	121	118	143	130	604
80	Marine	Marine S. cerevisiae	AZ69		90.3557	105.807	98.366	92.9497	95.8376		112	125	116	142	134	629
81	Marine	Marine S. cerevisiae	AZ71		93.7763	110.79	100.185	94.4068	40.6692		124	137	117	144	50	572
82	Marine	Marine S. cerevisiae	AZ116		72.8046	86.7996	87.5301	92.7563	68.7516		37	91	100	141	83	452
83	Marine	Marine S. cerevisiae	AZ117		69.7455	83.06	81.0209	81.0202	139.763		30	84	92	50	143	399
84	Marine	Marine S. cerevisiae	AZ118		96.3614	109.939	117.109	83.1534	107.568		137	135	143	77	137	629
85	Marine	Marine S. cerevisiae	AZ127		107.265	124.174	123.568	80.8667	102.454		144	144	144	48	136	616
86	Marine	Marine S. cerevisiae	AZ144		93.6691	114.459	106.717	82.3532	98.8641		123	140	133	66	135	597
87	Marine	Marine organism	M1		91.595	109.159	107.325	81.4401	63.8256		120	133	135	57	80	525
88	Marine	Marine organism	M2		100.09	118.342	113.7	89.187	90.4068		141	143	141	130	129	684
89	Marine	Marine organism	M3		90.9954	85.2842	104.173	82.1575	182.814		116	88	128	65	144	541
90	Marine	Marine organism	M4		94.5618	100.934	111.398	83.2722	136.768		129	111	140	79	142	601
91	Marine	Marine organism	M5		91.0592	95.4799	103.012	89.0658	78.8501		118	99	127	129	103	576
92	Marine	Marine organism	M6		95.7079	106.567	108.541	88.9687	79.2543		134	127	138	128	104	631
93	Marine	Marine organism	M7		91.1816	101.603	105.21	90.2588	82.5481		119	115	131	135	116	616
94	Marine	Seaweed	M8		88.5962	102.348	94.7485	82.6686	121.793		97	119	112	73	141	542
95	Marine	Seaweed	M9		84.4928	92.7846	101.185	90.3388	107.855		78	95	120	137	138	568
96	Marine	Seaweed	M10		89.3351	95.3824	105.207	89.7096	81.8892		105	98	130	132	113	578
97	Marine	Seaweed	M11		89.3291	91.6416	101.395	87.7733	83.8714		104	93	122	114	118	551
98	Marine	Seaweed	M12		77.6378	83.1774	92.0643	81.412	85.7191		54	86	108	56	120	424
99	Marine	Seaweed	M13		94.2674	101.764	102.718	90.3921	70.8563		128	116	126	138	87	595
100	Marine	Seaweed	M14		90.1446	101.404	101.063	88.2918	108.089		110	113	119	120	139	601
101	Marine	Seaweed	M15		95.6432	106.661	114.296	88.3093	109.081		133	129	142	121	140	665
102	Marine	Seaweed	M16		90.142	98.2688	98.144	80.4246	81.6243		109	104	115	45	111	484
103	Marine	Seaweed	M17		89.0294	99.1565	101.416	89.9966	86.4975		102	106	123	133	122	586
104	Marine	Driftwood	M18		94.0264	104.285	106.844	88.5192	72.248		126	124	134	123	95	602
105	Marine	Driftwood	M19		94.2255	107.408	108.334	89.547	76.6585		127	130	136	131	98	622
106	Marine	Driftwood	M20		89.7049	99.0375	105.942	80.3388	70.142		107	105	132	42	86	472
107	Marine	Driftwood	M21		94.9595	108.936	108.455	88.9235	64.7971		130	132	137	127	82	608
108	Marine	Driftwood	M22		98.4428	104.154	109.223	82.9599	38.5871		140	123	139	75	46	523
109	Marine	Driftwood	M23		100.966	112.689	101.951	80.3753	92.5551		142	138	124	44	132	580
110	Marine	Driftwood	M24		67.4216	74.8077	76.6358	80.8774	83.8913		24	67	85	49	119	344
111	Marine	Driftwood	M25		76.629	83.5042	86.5083	81.5804	32.5877		50	87	95	59	33	324
112	Marine	Driftwood	M26		42.5042	48.951	43.3112	88.1845	54.6416		7	10	9	118	69	213
113	Marine	Driftwood	M27		85.1336	96.5817	86.2054	81.9028	58.203		82	101	93	62	73	411
114	Marine	Marine organism	M28		90.85	100.836	96.536	87.6205	71.6396		115	110	114	113	90	542
115	Marine	Marine organism	M29		86.9395	101.831	95.3633	86.5888	77.5771		90	117	113	102	100	522
116	Marine	Driftwood	M30		90.2206	103.921	93.5316	84.7405	89.9647		111	122	111	85	128	557
117	Marine	Marine organism	M31		85.167	96.0928	92.036	88.8097	89.4573		83	100	107	126	127	543
118	Marine	Marine organism	M32		87.2425	101.034	102.173	88.1478	81.099		91	112	125	117	109	554
119	Marine	Marine organism	M33		88.9971	102.147	90.6685	74.8731	87.9989		101	118	105	18	124	466
120	Marine	Marine organism	M34		86.4849	98.2374	86.4273	71.6702	81.099		88	103	94	14	109	408
121	Marine	Sand	M35		69.6655	76.4379	60.2244	72.5011	89.329		28	70	31	15	126	270
122	Marine	Sand	M36		81.3805	93.8031	75.1875	87.8589	86.099		69	96	82	116	121	484
123	Marine	Sand	M37		95.7699	113.261	86.7193	82.6187	79.29		135	139	96	71	105	546
124	Marine	Sand	M38		88.5561	103.28	92.7774	81.2	75.009		96	120	109	54	96	475
125	Marine	Wet Seaweed	M39		82.018	80.1818	78.5814	75.595	80.966		71	81	88	20	107	367
126	Marine	Wet Seaweed	M40		93.3103	109.331	101.362	86.7837	72.166		122	134	121	105	94	576
127	Marine	Wet Seaweed	M41		67.0875	80.7893	64.5983	85.082	77.126		23	82	47	89	99	340
128	Marine	Wet Seaweed	M42		94.9926	114.605	88.792	88.8018	81.7389		131	141	102	125	112	611
129	Marine	Wet Seaweed	M43		88.2123	101.405	76.5466	86.7772	72.0636		94	114	84	104	92	488
130	Marine	Wet Seaweed	M44		92.4145	106.489	91.3247	87.365	69.8174		121	126	106	108	85	546
131	Marine	Wet Seaweed	M45		91.0268	107.869	89.8321	84.8814	71.716		117	131	104	87	91	530
132	Marine	Wet Seaweed	M46		86.152	100.676	88.4578	84.0578	71.1442		86	109	101	82	89	467
133	Marine	Wet Seaweed	M47		97.3627	106.57	104.444	83.1378	71.0247		139	128	129	76	88	560
134	Marine	Wet Seaweed	M48		95.9695	110.061	93.132	87.5124	87.8439		136	136	110	109	123	614
135	Marine	Wet Seaweed	M49		84.7048	99.5668	87.0642	85.1633	88.8956		79	107	97	90	125	498
136	Marine	Wet Seaweed	M50		74.6839	85.7056	69.2351	83.2458	91.8349		42	89	64	78	131	404
137	Marine	Wet Seaweed	M51		67.5777	77.4412	72.2396	85.8789	93.8459		25	72	76	97	133	403
138	Marine	Wet Seaweed	M52		65.5811	78.795	63.4614	90.3037	77.9105		19	78	43	136	101	377
139	Marine	Wet Seaweed	M53		84.9812	100.096	87.5013	82.5917	82.525		80	108	99	70	115	472
140	Marine	Wet Seaweed	M54		80.3841	97.7155	75.151	82.6452	72.0929		67	102	81	72	93	415
141	Marine	Wet Seaweed	M55		68.8892	81.1225	72.7114	82.4146	75.9774		26	83	77	67	97	350
142	Marine	Wet Seaweed	M56		58.5981	68.6429	57.6073	82.1555	78.3232		12	43	25	64	102	246
143	Marine	Wet Seaweed	M57		96.6694	115.169	89.6027	85.5436	81.466		138	142	103	95	110	588
144	Marine	Wet Seaweed	M58		57.7356	67.903	63.7822	84.8583	82.2133		11	40	44	86	114	295
